# Supplementary material
Source: publisher site journal article supplement (https://www.dovepress.com/article/363931)
Supplement: Supplementary file 1 [file get_supplementary_file.php]

**Table S1. Predictors of knowledge of pharmacy professionals on patient-centered communication across the categories of socio-demographic and other background characteristics, attitude and self-efficacy score**

| **Variable** | **Category** | **Mean (SD)** | **F/t Value** | ***p*-value** |
| --- | --- | --- | --- | --- |
| Sex | Male | 12.11 (2.1) | 0.807 | 0.423 |
| Female | 11.66 (2.1) |
| Qualification | Diploma | 11.63 (2.0) | -0.761 | 0.449 |
| Bachelor’s degree and above | 12.07 (2.2) |
| Work setting | Drug retail outlet | 12.0 (1.9) | 0.951 | 0.346 |
| Hospital | 11.5 (2.5) |
| Training and/ or workshop on PCC | Yes | 11.79 (2.2) | -0.365 | 0.716 |
| No | 12.0 (2.16) |
| **Variables** | | **rs** | **df** | ***p*-value** |
| Age | | 0.006 | 59 | 0.961 |
| Work experience | | -0.052 | 59 | 0.691 |
| Attitude score | | -0.163 | 59 | 0.209 |
| Self-efficacy score | | 0.124 | 59 | 0.342 |
| ***Note:*** *SD: Standard deviation,* rs: *Spearman rank correlation,*  *df = degree of freedom; PCC: Patient-centered communication* | | | | |

**Table S2. Predictors of attitude of pharmacy professionals on patient-centered communication across the categories of socio-demographic and other background characteristics, knowledge and self-efficacy score**

| **Variable** | **Category** | **Mean (SD)** | **F/t Value** | ***p*-value** |
| --- | --- | --- | --- | --- |
| Sex | Male | 40.11 (3.06) | 1.557 | 0.125 |
| Female | 38.85 (3.26) |
| Qualification | Diploma | 39.90 (3.91) | 0.643 | 0.522 |
| Bachelor’s degree and above | 39.36 (2.74) |
| Work setting | Drug retail outlet | 39.85 (3.02) | 1.093 | 0.279 |
| Hospital | 38.89 (3.52) |
| Training and/ or workshop on PCC | Yes | 39.62 (2.84) | 0.132 | 0.895 |
| No | 39.51 (3.43) |
| **Variables** | | **rs** | **df** | ***p*-value** |
| Age | | -0.247 | 59 | 0.055 |
| Work experience | | -0.195 | 59 | 0.132 |
| Knowledge score | | -0.163 | 59 | 0.209 |
| Self-efficacy score | | 0.311 | 59 | 0.015 |
| ***Note:*** *SD: Standard deviation,* rs: *Spearman rank correlation,*  *df = degree of freedom* | | | | |

**Table S3. Predictors of the sub-scale of ‘exploring patient’s perspectives’ of pharmacy professionals across the categories of socio-demographic and other background characteristics and knowledge and attitude score**

| **Variable** | **Category** | **Mean (SD)** | **F/t Value** | ***p*-value** |
| --- | --- | --- | --- | --- |
| Sex | Male | 23.58 (5.5) | 1.514 | 0.134 |
| Female | 21.83 (4.55) |
| Qualification | Diploma | 21.58 (5.05) | -1.689 | 0.095 |
| Bachelor’s degree and above | 23.56 (5.11) |
| Master’s degree | 28 (5.568) |
| Work setting | Drug retail outlet | 23.9 (4.8) | 3.263 | 0.002 |
| Hospital | 20.0 (4.9) |
| Training and/ or workshop on PCC | Yes | 23.96 (5.73) | 1.387 | 0.169 |
| No | 22.24 (4.82) |
| Heard or read the term PCC before | Yes | 22.8 (5.18) | 0.59 | 0.55 |
| No | 22 (5.26) |
| **Variables** | | **rs** | **df** | ***p*-value** |
| Age | | 0.129 | 77 | 0.257 |
| Work experience | | 0.161 | 77 | 0.157 |
| Knowledge score | | 0.076 | 59 | 0.209 |
| Attitude score | | 0.185 | 59 | 0.154 |
| ***Note:*** *SD: Standard deviation,* rs: *Spearman rank correlation,*  *df = degree of freedom* | | | | |

**Table S4. Predictors of the sub-scale of ‘sharing information and power’ of pharmacy professionals across the categories of socio-demographic and other background characteristics and knowledge and attitude score**

| **Variable** | **Category** | **Mean (SD)** | **F/t Value** | ***p*-value** |
| --- | --- | --- | --- | --- |
| Sex | Male | 16.26 (4.5) | 0.628 | 0.532 |
| Female | 15.64 (4.12) |
| Qualification | Diploma | 15.26 (4.46) | -1.185 | 0.240 |
| Bachelor’s degree and above | 16.44 (4.23) |
| Work setting | Drug retail outlet | 16.5 (4.4) | 1.858 | 0.067 |
| Hospital | 14.6 (3.8) |
| Training and/ or workshop on PCC | Yes | 16.56 (4.71) | 0.815 | 0.417 |
| No | 15.7 (4.16) |
| Heard or read the term PCC before | Yes | 16.4 (4.35) | 3.802 | <0.001 |
| No | 13.3 (2.46) |
| **Variables** | | **rs** | **df** | ***p*-value** |
| Age | | 0.03 | 77 | 0.794 |
| Work experience | | 0.034 | 77 | 0.767 |
| Knowledge score | | 0.063 | 59 | 0.063 |
| Attitude score | | 0.250 | 59 | 0.052 |
| ***Note:*** *SD: Standard deviation,* rs: *Spearman rank correlation,*  *df = degree of freedom* | | | | |

**Table S5. Predictors of the sub-scale of ‘dealing with communicative challenges’ of pharmacy professional across the categories of socio-demographic and other background characteristics, knowledge and attitude score at bivariate and multivariate levels**

| **Variable** | | **Category** | | **Mean (SD)** | **F/t Value** | | | ***p*-value** |
| --- | --- | --- | --- | --- | --- | --- | --- | --- |
| Sex | | Male | | 13.67 (4.23) | -0.199 | | | 0.843 |
| Female | | 13.86 (4.27) |
| Qualification | | Diploma | | 13.23 (4.03) | -0.924 | | | 0.358 |
| Bachelor’s degree and above | | 14.10 (4.18) |
| Work setting | | Drug retail outlet | | 13.5 (4.1) | -0.816 | | | 0.417 |
| Hospital | | 14.3 (3.0) |
| Training and/ or workshop on PCC | | Yes | | 12.4 (4.6) | -2.035 | | | 0.045 |
| No | | 14.39 (3.75) |
| Heard or read the term PCC before | | Yes | | 13.6 (4.1) | -0.278 | | | 0.782 |
| No | | 14.0 (3.5) |
| **Variables** | | | | **rs** | **df** | | | ***p*-value** |
| **Age** | | | | -0.241 | 77 | | | 0.032 |
| Work experience | | | | -0.252 | 77 | | | 0.025 |
| Knowledge score | | | | 0.129 | 59 | | | 0.323 |
| Attitude score | | | | 0.233 | 59 | | | 0.071 |
| **Variable** | **Unstandardized coefficient** | | **Standardized coefficient** | | | **T-value** | ***p*-value** | |
| Work experience | -0.059 | | -0.179 | | | -1.411 | 0.162 | |
| Training | -2.302 | | -0.261 | | | -2.439 | 0.017 | |
| Intercept | 16.337 | |  | | | 19.252 | <0.001 | |
| R2 = 0.049 Adjusted R2 = 0.115 | | | | | | | | |
| ***Note:*** *SD: Standard deviation,* rs: *Spearman rank correlation,*  *df = degree of freedom* | | | | | | | | |

**Table S6. Predictors of self-efficacy of pharmacy professionals across the categories of socio-demographic and other background characteristics, knowledge and attitude score at bivariate level**

| **Variable** | **Category** | **Mean (SD)** | **F/t Value** | ***p*-value** |
| --- | --- | --- | --- | --- |
| **Sex** | Male | 53.1 (11.05) | 1.041 | 0.301 |
| Female | 51.33 (7.44) |
| **Qualification** | Diploma | 50.06 (9.73) | -1.857 | 0.067 |
| Bachelor’s degree and above | 54.10 (9.25) |
| **Work setting** | Drug retail outlet | 54.0 (9.8) | 2.180 | 0.032 |
| Hospital | 49.0 (8.1) |
| **Training and/ or workshop on PCC** | Yes | 52.9 (10.64) | 0.251 | 0.802 |
| No | 52.33 (9.15) |
| **Heard or read the term PCC before** | Yes | 53.0 (9.6) | 1.399 | 0.166 |
| No | 49.3 (8.6) |
| **Variables** | | **rs** | **df** | ***p*-value** |
| **Age** | | -0.021 | 77 | 0.855 |
| **Work experience** | | -0.007 | 77 | 0.953 |
| **Knowledge score** | | 0.124 | 59 | 0.342 |
| **Attitude score** | | 0.311 | 59 | 0.015 |
| ***Note:*** *SD: Standard deviation,* rs: *Spearman rank correlation,*  *df = degree of freedom* | | | | |
